# Supplementary material
Source: publisher figshare collection journal article supplement (https://springernature.figshare.com/ndownloader/files/12942029)

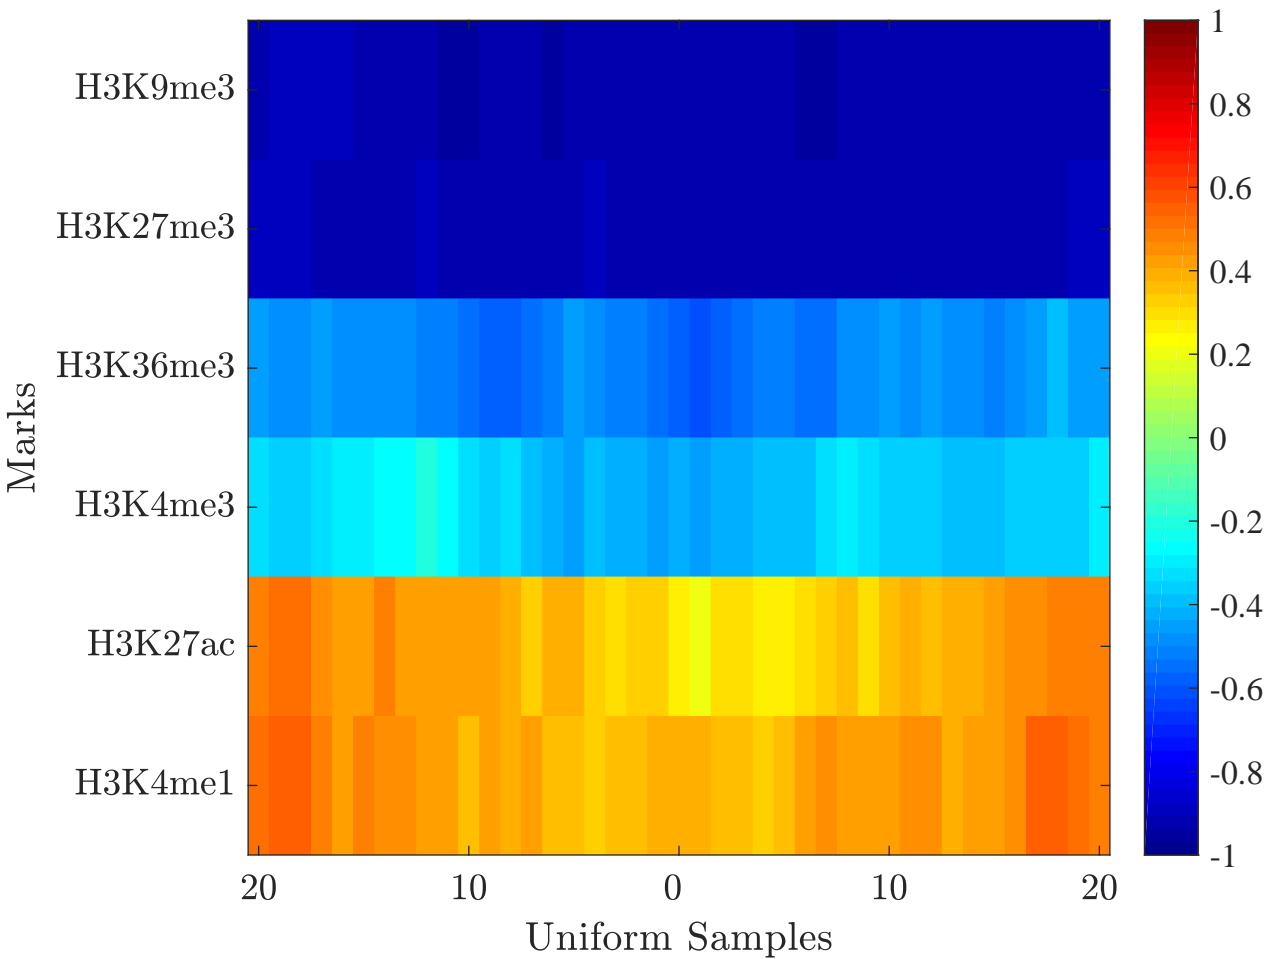

Supplement: Supplementary file 1 [file 12942029]

Marks

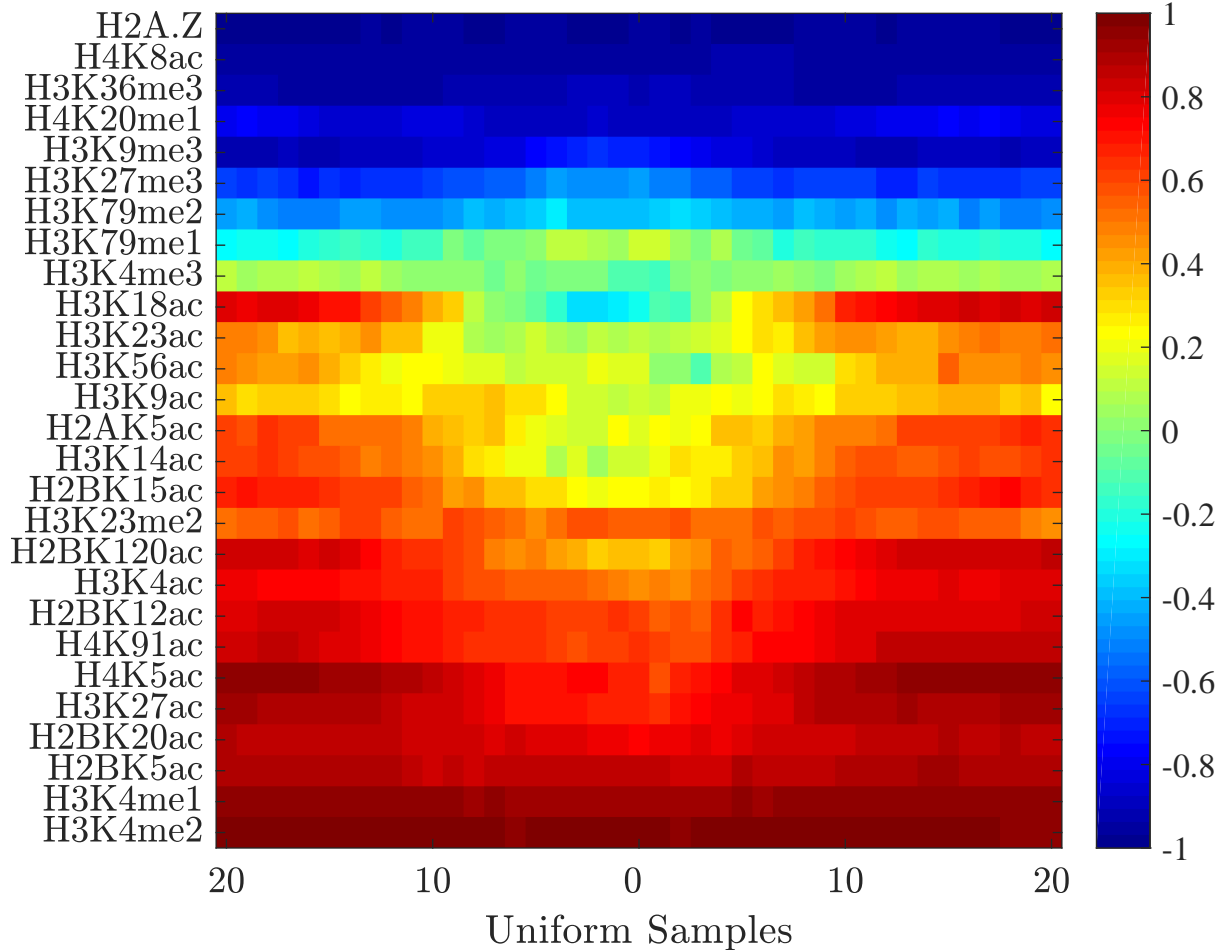

Supplement: Supplementary file 2 [file 12942029]

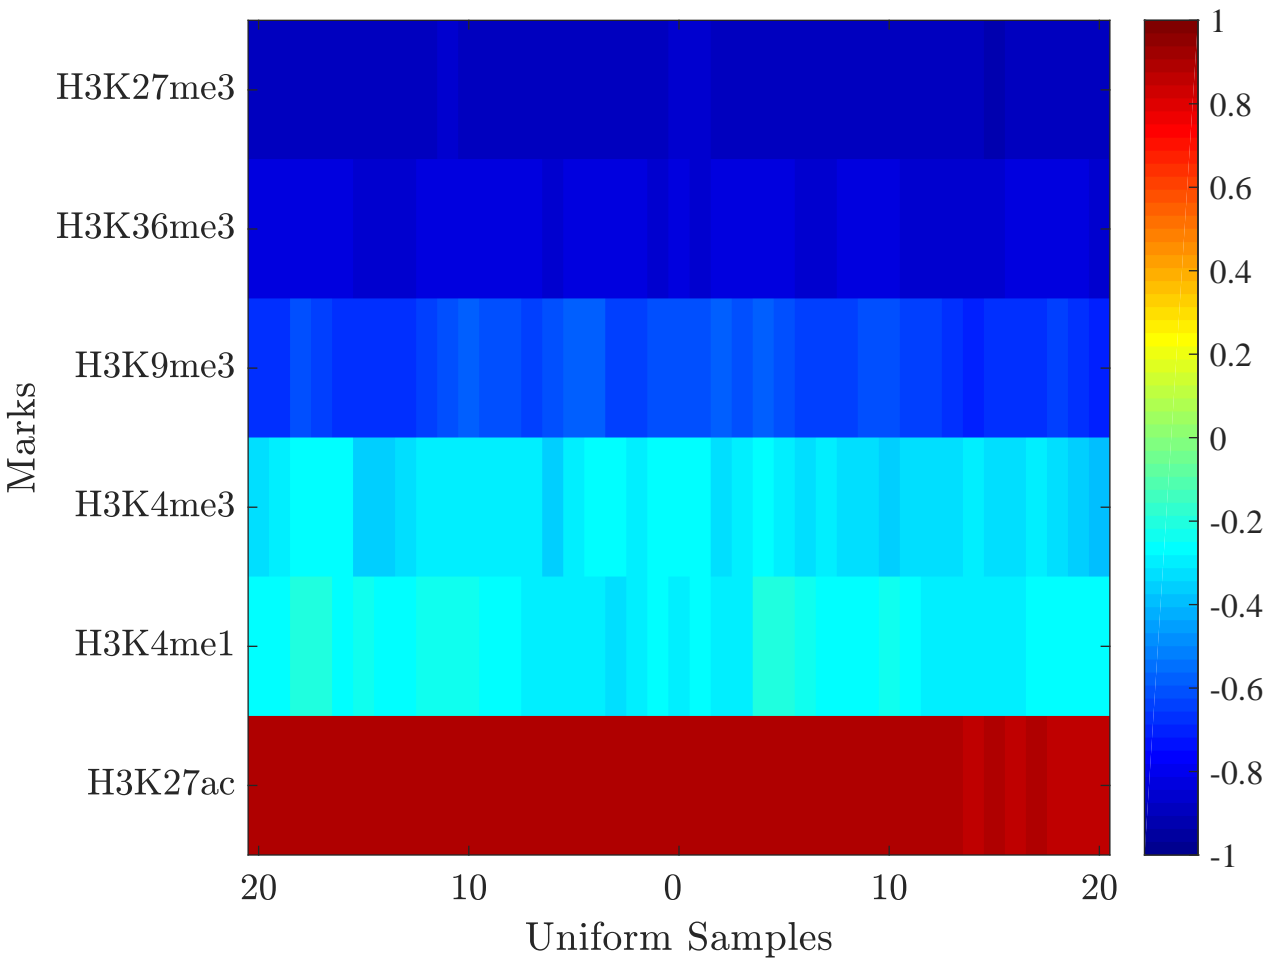

Supplement: Supplementary file 4 [file 12942029]

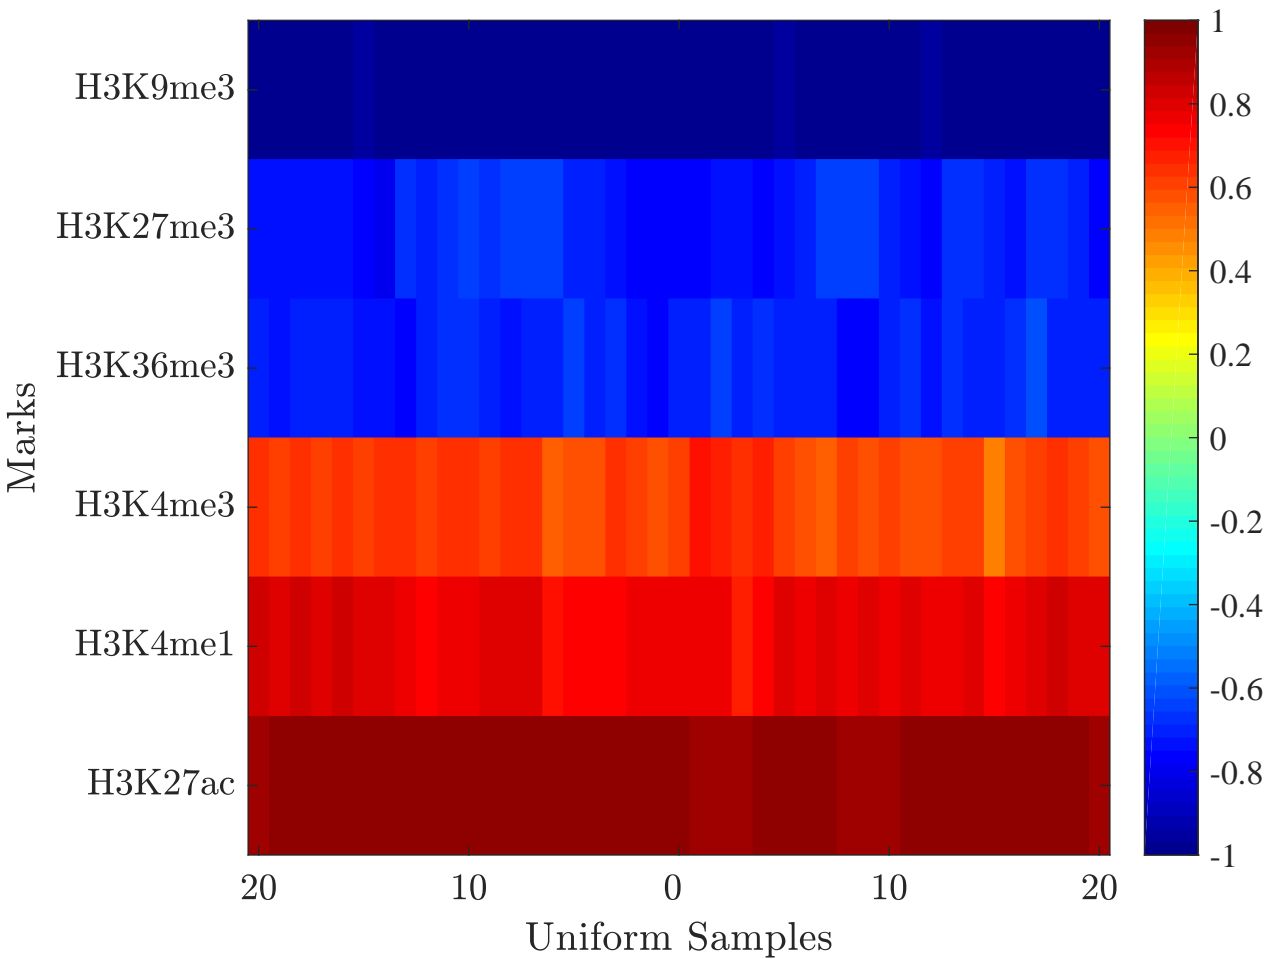

Supplement: Supplementary file 5 [file 12942029]

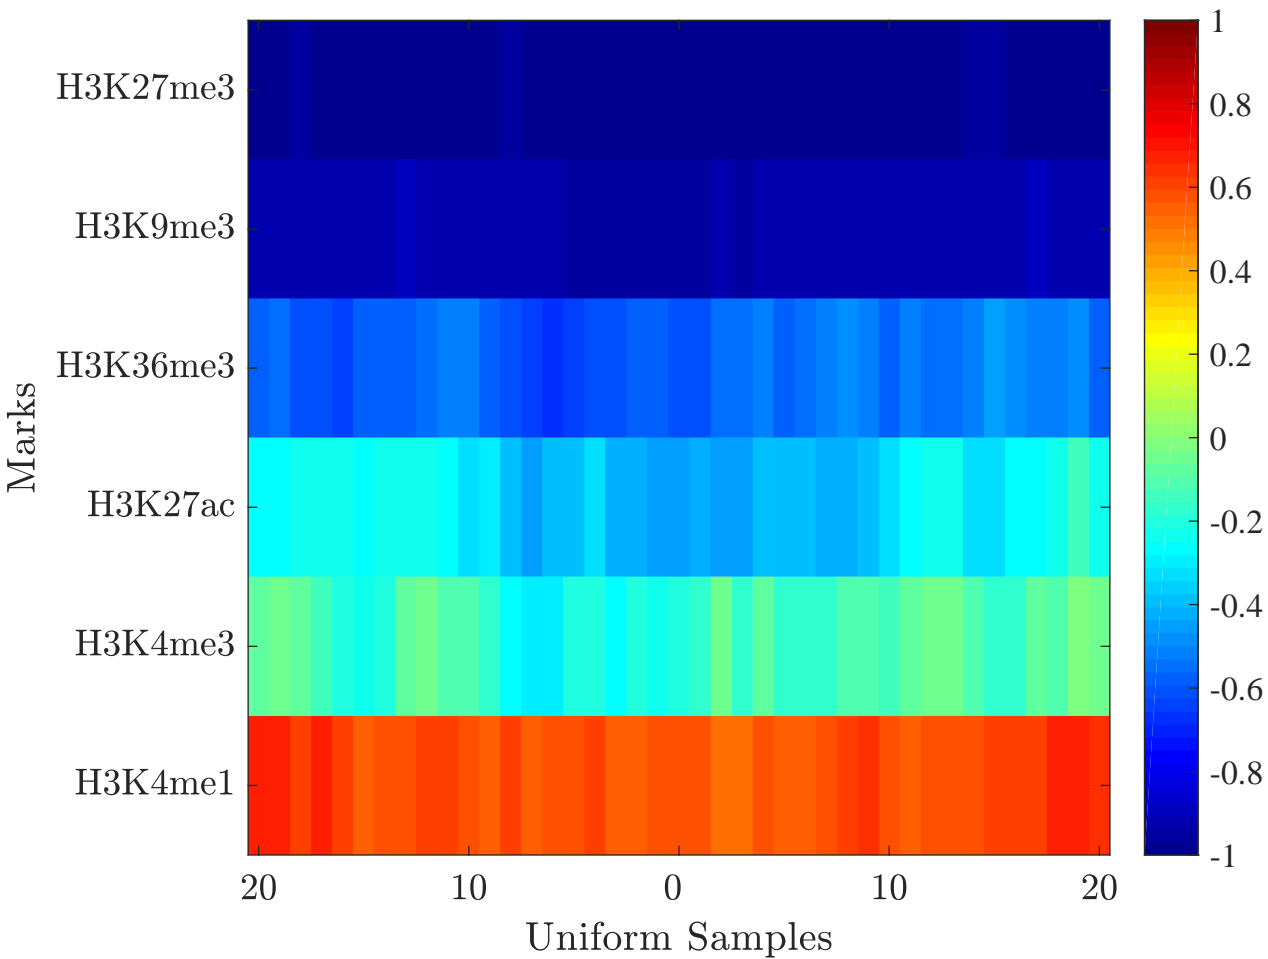

Supplement: Supplementary file 6 [file 12942029]

Marks

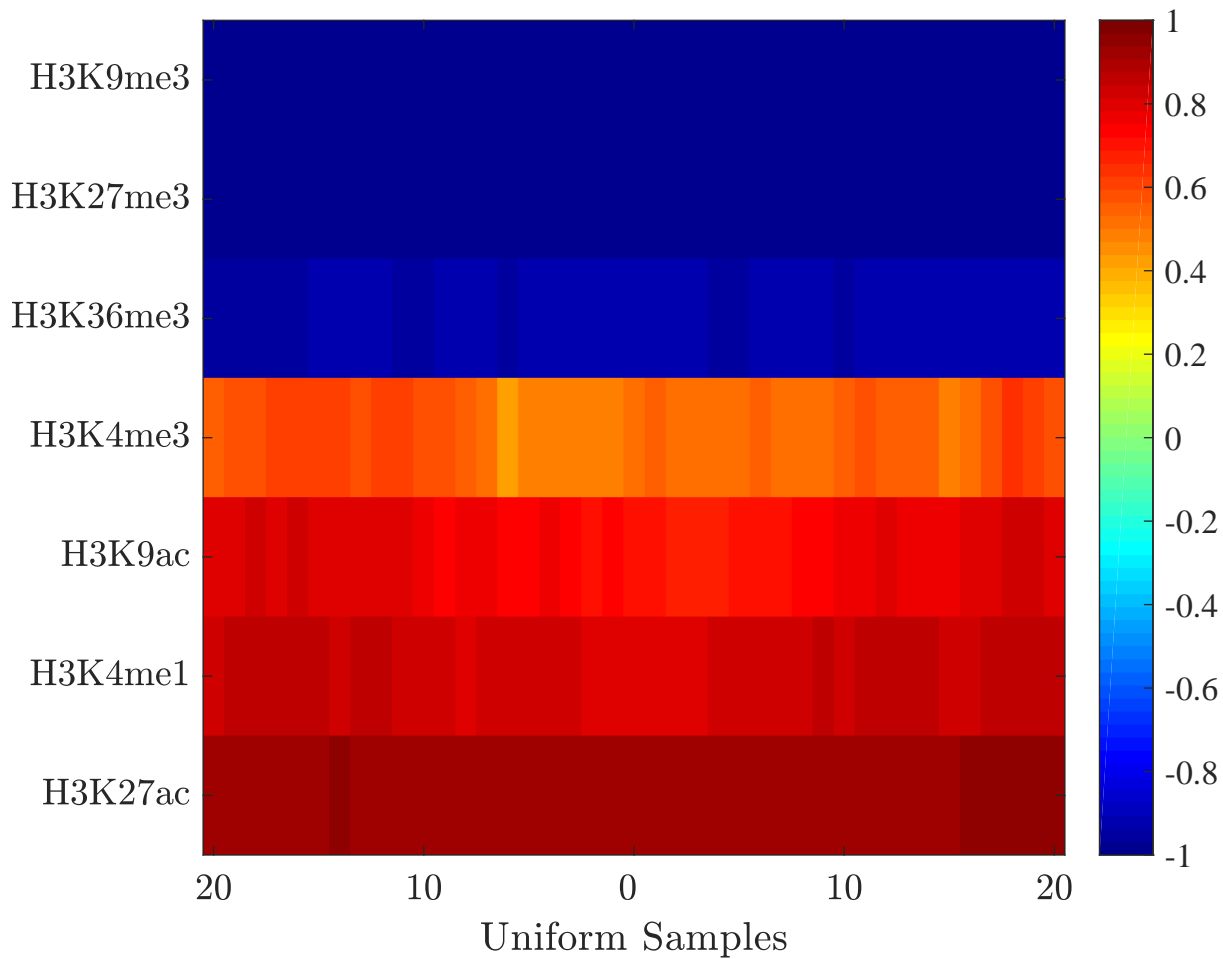

Supplement: Supplementary file 7 [file 12942029]

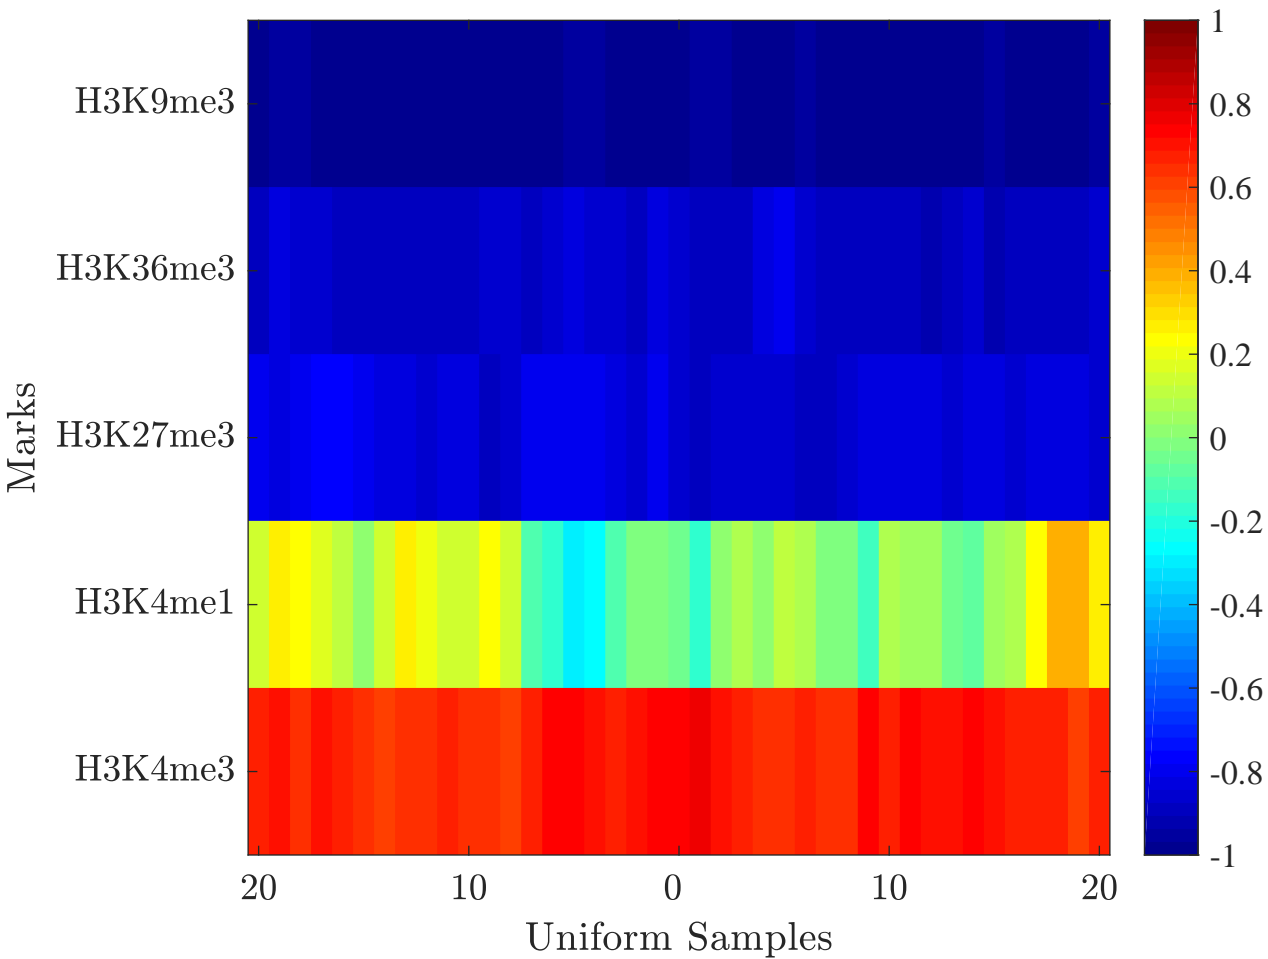

Supplement: Supplementary file 8 [file 12942029]

Marks

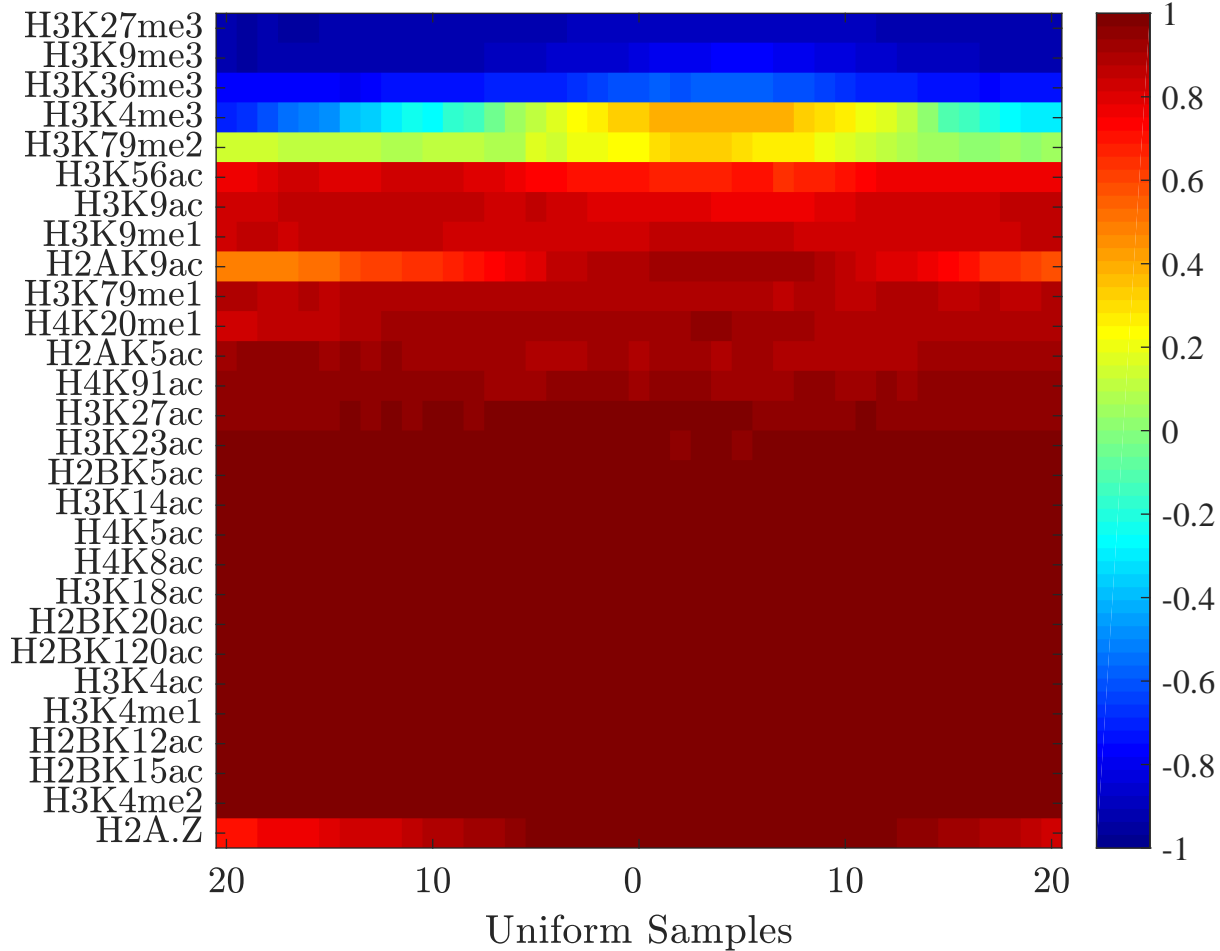

Supplement: Supplementary file 9 [file 12942029]
